# Supplementary material for: Countrywide Mortality Surveillance for Action in Mozambique: Results from a National Sample-Based Vital Statistics System for Mortality and Cause of Death
Source: PubMed Central journal article supplement (PMC10160865; doi:10.4269/ajtmh.22-0367), 2023-04-10
Supplement: tpmd220367.SD1.pdf [file tpmd220367.SD1.pdf]

SUPPLEMENTAL APPENDIX - COMSA RESULT PAPER

SUPPLEMENTAL APPENDIX TABLE 1

Sample size calculation for the COMSA project

| Province        | U5MR (DHS 2011), reference year 2007 | Projected U5MR to 2016* | IMR (DHS 2011), reference year 2007 | Projected IMR to 2016* | Relative error margin (2 SE/X) (%) | Absolute error margin (IMR) (2SE) | Average HH size (DHS 2011) | Number of annual births (based on IMR) | Estimated annual under-five deaths | Estimated annual infant deaths | Estimated HHs | Estimated number of SRS EAs (300HH/EAs) | Estimated total population in SRS clusters | Estimated total number of deaths (based on CDR = 0.010) | Absolute margin of error for U5MR (2 SE) | Estimated number of infant children (based on 4%) | Estimated number of under-five children (based on 18%) |
|-----------------|--------------------------------------|-------------------------|-------------------------------------|------------------------|------------------------------------|-----------------------------------|----------------------------|----------------------------------------|------------------------------------|--------------------------------|---------------|-----------------------------------------|--------------------------------------------|---------------------------------------------------------|------------------------------------------|---------------------------------------------------|--------------------------------------------------------|
| (1)             | (2)                                  | (3)                     | (4)                                 | (5)                    | (6)                                | (7)                               | (8)                        | (9)                                    | (10)                               | (11)                           | (12)          | (13)                                    | (14)                                       | (15)                                                    | (16)                                     | (17)                                              | (18)                                                   |
| Inhambane       | 0.058                                | 0.037                   | 0.039                               | 0.026                  | 29                                 | 0.007                             | 4.1                        | 2,516                                  | 92                                 | 64                             | 14,845        | 49                                      | 61,362                                     | 614                                                     | 0.009                                    | 2,454                                             | 11,045                                                 |
| Nampula         | 0.067                                | 0.042                   | 0.041                               | 0.027                  | 29                                 | 0.008                             | 3.6                        | 2,390                                  | 101                                | 64                             | 16,009        | 53                                      | 58,290                                     | 583                                                     | 0.010                                    | 2,332                                             | 10,492                                                 |
| Maputo City     | 0.080                                | 0.051                   | 0.061                               | 0.040                  | 25                                 | 0.010                             | 4.9                        | 2,132                                  | 108                                | 85                             | 10,651        | 36                                      | 52,009                                     | 520                                                     | 0.011                                    | 2,080                                             | 9,362                                                  |
| Maputo Province | 0.096                                | 0.061                   | 0.068                               | 0.045                  | 25                                 | 0.011                             | 4.4                        | 1,904                                  | 116                                | 85                             | 10,668        | 36                                      | 46,432                                     | 464                                                     | 0.013                                    | 1,857                                             | 8,358                                                  |
| Niassa          | 0.101                                | 0.064                   | 0.061                               | 0.040                  | 25                                 | 0.010                             | 4.3                        | 2,132                                  | 136                                | 85                             | 12,033        | 40                                      | 52,009                                     | 520                                                     | 0.012                                    | 2,080                                             | 9,362                                                  |
| Sofala          | 0.105                                | 0.066                   | 0.073                               | 0.048                  | 25                                 | 0.012                             | 5.0                        | 1,767                                  | 117                                | 85                             | 8,551         | 29                                      | 43,103                                     | 431                                                     | 0.014                                    | 1,724                                             | 7,759                                                  |
| Gaza            | 0.110                                | 0.070                   | 0.063                               | 0.041                  | 25                                 | 0.010                             | 4.7                        | 2,062                                  | 143                                | 85                             | 10,746        | 36                                      | 50,289                                     | 503                                                     | 0.013                                    | 2,012                                             | 9,052                                                  |
| Manica          | 0.114                                | 0.072                   | 0.064                               | 0.042                  | 17                                 | 0.007                             | 4.4                        | 4,550                                  | 328                                | 191                            | 25,405        | 85                                      | 110,977                                    | 1,110                                                   | 0.009                                    | 4,439                                             | 19,976                                                 |
| Cabo Delgado    | 0.116                                | 0.073                   | 0.082                               | 0.054                  | 13                                 | 0.007                             | 4.1                        | 5,758                                  | 422                                | 309                            | 33,933        | 113                                     | 140,439                                    | 1,404                                                   | 0.008                                    | 5,618                                             | 25,279                                                 |
| Tete            | 0.129                                | 0.082                   | 0.086                               | 0.056                  | 12                                 | 0.007                             | 4.6                        | 6,022                                  | 491                                | 339                            | 31,948        | 106                                     | 146,882                                    | 1,469                                                   | 0.008                                    | 5,875                                             | 26,439                                                 |
| Zambezia        | 0.142                                | 0.090                   | 0.095                               | 0.062                  | 11                                 | 0.007                             | 4.6                        | 6,611                                  | 593                                | 412                            | 35,304        | 118                                     | 161,239                                    | 1,612                                                   | 0.008                                    | 6,450                                             | 29,023                                                 |
| Total           |                                      |                         |                                     |                        |                                    |                                   |                            | 37,844                                 | 2,649                              | 1,805                          | 21,0093       | 700                                     | 92,3031                                    | 9,230                                                   |                                          | 36,921                                            | 16,6146                                                |

COMSA = Countrywide Mortality Surveillance for Action; DHS = Demographic and Health Survey; EAs = Enumeration areas; HH = household; IMR = infant mortality rate; SRS = stratified random sample; U5MR = under-five mortality rate.

Assumptions: design effect = 1.3 based on DHS 2011; response rate of 90%; crude birth rate of 41 per 1,000 based on DHS 2011; crude death rate of 10 per 1000 based on 2007 population census. Error margin is 2 × standard error of the estimate. \* Projection using annual rate of reduction (2000–2010) based on United Nations Inter-agency Group for Child Mortality Estimation estimates of national infant and under-five mortality rates (2010 was used instead of 2015 because 2015 estimates were based on extrapolation).

SUPPLEMENTAL APPENDIX TABLE 2

Distribution of COMSA population, births deaths, and crude birth and death rates at national level, by place of residence and by province

| Population      | Total population* |          | Total births† |          | Total deaths† |          | CBR  | 95% CI of CBR | CDR | 95% CI of CDR |
|-----------------|-------------------|----------|---------------|----------|---------------|----------|------|---------------|-----|---------------|
|                 | Unweighted        | Weighted | Unweighted    | Weighted | Unweighted    | Weighted |      |               |     |               |
| National        | 744,732           | 744,732  | 44,432        | 41,880   | 11,162        | 10,716   | 30.2 | 29.0–31.3     | 7.9 | 7.5–8.2       |
| Urban           | 253,796           | 223,740  | 12,555        | 10,259   | 3,512         | 2,917    | 24.5 | 23.1–26.0     | 7.1 | 6.7–7.6       |
| Rural           | 490,936           | 520,992  | 31,877        | 31,621   | 7,650         | 7,799    | 32.4 | 31.1–34.0     | 8.2 | 7.7–8.6       |
| Niassa          | 40,344            | 50,002   | 3,545         | 4,267    | 651           | 790      | 45.5 | 41.4–50.1     | 8.6 | 7.5–9.8       |
| Cabo Delgado    | 81,187            | 44,259   | 5,670         | 2,951    | 1,458         | 779      | 35.6 | 32.9–38.7     | 9.4 | 8.1–10.6      |
| Nampula         | 53,879            | 99,402   | 3,563         | 6,169    | 899           | 1,545    | 33.1 | 30.4–36.0     | 8.6 | 7.7–9.6       |
| Zambezia        | 132,137           | 157,245  | 7,764         | 8,494    | 2,178         | 2,439    | 28.8 | 25.7–32.1     | 8.5 | 7.5–9.5       |
| Tete            | 112,338           | 92,298   | 6,898         | 5,112    | 1,231         | 901      | 29.6 | 27.1–32.5     | 5.4 | 4.7–6.2       |
| Manica          | 86,409            | 51,289   | 6,159         | 3,500    | 1,369         | 784      | 36.4 | 34.5–38.8     | 8.3 | 7.6–9.1       |
| Sofala          | 37,177            | 56,844   | 2,503         | 3,636    | 626           | 908      | 34.1 | 29.9–38.5     | 9.0 | 7.6–10.4      |
| Inhambane       | 57,408            | 52,082   | 2,442         | 2,142    | 892           | 788      | 21.9 | 20.0–24.2     | 7.9 | 7.0–8.9       |
| Gaza            | 47,305            | 57,298   | 2,315         | 2,679    | 742           | 876      | 24.9 | 23.6–26.6     | 8.2 | 7.0–9.3       |
| Maputo Province | 47,614            | 46,242   | 1,649         | 1,538    | 473           | 441      | 17.7 | 15.8–19.8     | 5.1 | 4.4–5.8       |
| Maputo City     | 48,934            | 37,773   | 1,924         | 1,392    | 643           | 464      | 19.7 | 18.4–21.1     | 6.7 | 5.9–7.4       |

CBR = crude birth weight; CDR = crude death rate; COMSA = Countrywide Mortality Surveillance for Action.

\* Unweighted population estimated for the year 2020.

† Unweighted population estimated for the period 2019–2020.

SUPPLEMENTAL APPENDIX TABLE 3

Mortality rates and 95% CI, COMSA data

|              | Neonatal rate |           | Infant mortality rate |           | Under-five mortality rate |            | 5–14 years old |           | 15–24 years old |           | 25–59 years old |             | 60+ years old |             |
|--------------|---------------|-----------|-----------------------|-----------|---------------------------|------------|----------------|-----------|-----------------|-----------|-----------------|-------------|---------------|-------------|
|              | Value         | 95% CI    | Value                 | 95% CI    | Value                     | 95% CI     | Value          | 95% CI    | Value           | 95% CI    | Value           | 95% CI      | Value         | 95% CI      |
| National     | 23.2          | 18.2–28.2 | 46.0                  | 38.1–53.8 | 80.0                      | 69.0–90.9  | 17.7           | 14.0–21.4 | 25.6            | 20.3–30.9 | 258.3           | 229.5–287.2 | 531.2         | 490.3–572.1 |
| Urban        | 19.1          | 10.4–27.8 | 33.7                  | 22.5–44.9 | 57.5                      | 40.5–74.5  | 13.7           | 8.6–18.7  | 23.6            | 16.0–31.3 | 262.3           | 219.4–305.1 | 558.1         | 504.4–611.8 |
| Rural        | 24.5          | 18.6–30.5 | 50.0                  | 40.3–59.6 | 87.3                      | 74.1–100.5 | 19.2           | 14.4–23.9 | 26.7            | 19.7–33.6 | 256.3           | 218.4–294.2 | 520.0         | 466.5–573.6 |
| Niassa       | 23.6          | 3.8–43.3  | 38.0                  | 14.9–61.0 | 70.3                      | 33.9–106.7 | 21.3           | 2.0–40.6  | 28.0            | 11.2–44.8 | 283.2           | 195.0–371.4 | 583.9         | 413.6–754.2 |
| Cabo Delgado | 20.4          | 8.3–32.4  | 44.9                  | 28.1–61.7 | 81.7                      | 58.0–105.4 | 26.0           | 13.6–38.3 | 26.0            | 11.5–40.5 | 342.4           | 209.6–475.1 | 524.6         | 397.2–652.0 |
| Nampula      | 15.1          | 5.2–25.1  | 39.5                  | 18.6–60.5 | 85.2                      | 49.6–120.9 | 23.8           | 12.1–35.5 | 33.2            | 13.6–52.8 | 280.5           | 193.4–367.7 | 539.9         | 424.1–655.6 |
| Zambezia     | 28.3          | 16.5–40.0 | 66.3                  | 42.9–89.8 | 108.6                     | 79.4–137.9 | 20.1           | 11.4–28.7 | 32.9            | 18.3–47.5 | 284.5           | 205.3–363.8 | 500.8         | 365.2–636.4 |
| Tete         | 22.7          | 7.6–37.9  | 41.9                  | 24.9–58.8 | 72.1                      | 47.7–96.5  | 15.8           | 5.7–26.0  | 17.1            | 7.1–27.2  | 129.5           | 77.5–181.4  | 404.2         | 291.4–517.0 |
| Manica       | 30.5          | 17.8–43.3 | 54.5                  | 35.9–73.2 | 84.3                      | 59.5–109.2 | 14.0           | 5.8–22.3  | 27.4            | 13.3–41.5 | 278.7           | 213.8–343.6 | 501.9         | 393.8–609.9 |
| Sofola       | 32.7          | 6.2–59.2  | 53.2                  | 20.7–85.7 | 89.5                      | 48.7–130.3 | 15.7           | 0.2–31.3  | 33.1            | 4.5–61.8  | 293.4           | 185.0–401.8 | 534.0         | 417.1–650.8 |
| Inhambane    | 18.9          | 6.9–30.9  | 32.1                  | 14.6–49.7 | 60.9                      | 29.9–91.9  | 10.6           | 1.6–19.7  | 19.3            | 6.2–32.3  | 289.6           | 190.4–388.7 | 642.9         | 515.7–770.0 |
| Gaza         | 22.2          | 5.4–39.1  | 36.1                  | 13.0–59.2 | 53.7                      | 25.8–81.5  | 15.0           | 4.1–26.0  | 21.2            | 7.7–34.8  | 271.4           | 181.7–361.1 | 583.7         | 486.0–681.3 |
| Maputo Prov  | 14.5          | –0.2–29.2 | 23.5                  | 5.9–41.1  | 39.1                      | 15.3–62.9  | 7.5            | 1.2–13.9  | 12.8            | 2.9–22.7  | 185.0           | 121.0–249.0 | 473.2         | 365.3–581.1 |
| Maputo City  | 9.9           | 0.1–19.6  | 16.7                  | 4.1–29.2  | 26.9                      | 8.2–45.7   | 9.3            | –2.0–20.6 | 14.8            | 2.2–27.4  | 228.1           | 173.5–282.7 | 551.4         | 435.3–667.6 |

COMSA = Countrywide Mortality Surveillance for Action.

SUPPLEMENTAL APPENDIX TABLE 4

Life expectancy at age  $x$ ,  $x$  from 0 to 85 years, COMSA data 2019–2020

| Age | Mortality rate (ages $x$ , $x + n$ ) per 1,000 |        |         | Probability of death (ages $x$ , $x + n$ ) per 1,000 |         |         | Life expectancy at age $x$ (both sexes) |       |         |
|-----|------------------------------------------------|--------|---------|------------------------------------------------------|---------|---------|-----------------------------------------|-------|---------|
|     | Total                                          | Males  | Females | Total                                                | Males   | Females | Total                                   | Males | Females |
| 0   | 37.5                                           | 39.12  | 35.91   | 36.6                                                 | 38.1    | 35.1    | 63.2                                    | 60.4  | 66.1    |
| 1   | 7.6                                            | 8.39   | 6.90    | 29.9                                                 | 32.8    | 27.1    | 64.6                                    | 61.8  | 67.5    |
| 5   | 2.0                                            | 2.24   | 1.71    | 9.8                                                  | 11.1    | 8.5     | 62.5                                    | 59.8  | 65.3    |
| 10  | 1.4                                            | 1.55   | 1.25    | 7.0                                                  | 7.7     | 6.2     | 58.1                                    | 55.5  | 60.9    |
| 15  | 2.1                                            | 1.90   | 2.24    | 10.3                                                 | 9.4     | 11.1    | 53.5                                    | 50.9  | 56.2    |
| 20  | 3.2                                            | 3.61   | 2.79    | 15.8                                                 | 17.9    | 13.8    | 49.0                                    | 46.3  | 51.8    |
| 25  | 5.4                                            | 5.65   | 5.07    | 26.4                                                 | 27.9    | 25.0    | 44.8                                    | 42.1  | 47.5    |
| 30  | 7.1                                            | 7.62   | 6.61    | 34.8                                                 | 37.4    | 32.5    | 40.9                                    | 38.3  | 43.7    |
| 35  | 8.6                                            | 10.09  | 7.37    | 42.3                                                 | 49.2    | 36.2    | 37.3                                    | 34.7  | 40.0    |
| 40  | 9.9                                            | 12.35  | 7.63    | 48.3                                                 | 59.9    | 37.4    | 33.9                                    | 31.3  | 36.5    |
| 45  | 10.2                                           | 11.88  | 8.56    | 49.6                                                 | 57.7    | 41.9    | 30.5                                    | 28.2  | 32.8    |
| 50  | 13.9                                           | 16.37  | 11.69   | 67.4                                                 | 78.6    | 56.8    | 26.9                                    | 24.7  | 29.1    |
| 55  | 16.7                                           | 19.80  | 13.79   | 80.0                                                 | 94.3    | 66.6    | 23.7                                    | 21.6  | 25.7    |
| 60  | 22.0                                           | 24.82  | 19.56   | 104.2                                                | 116.8   | 93.2    | 20.5                                    | 18.6  | 22.4    |
| 65  | 29.7                                           | 34.59  | 25.65   | 138.0                                                | 159.2   | 120.5   | 17.6                                    | 15.7  | 19.4    |
| 70  | 37.2                                           | 44.10  | 31.69   | 170.4                                                | 198.6   | 146.8   | 15.0                                    | 13.2  | 16.7    |
| 75  | 53.9                                           | 63.71  | 46.19   | 237.7                                                | 274.8   | 207.0   | 12.6                                    | 10.9  | 14.2    |
| 80  | 66.3                                           | 84.84  | 54.74   | 284.5                                                | 350.0   | 240.7   | 10.8                                    | 9.1   | 12.2    |
| 85  | 110.6                                          | 130.75 | 97.22   | 1,000.0                                              | 1,000.0 | 1,000.0 | 9.0                                     | 7.6   | 10.3    |

COMSA = Countrywide Mortality Surveillance for Action.

SUPPLEMENTAL APPENDIX TABLE 5

Cause specific mortality fractions by age group at national, regional, and sex levels

| Causes of death             | National*                     |      |           | Central                       |     |           | Northern                      |      |           | Southern                      |      |           | Females                       |      |           | Males                         |      |           |
|-----------------------------|-------------------------------|------|-----------|-------------------------------|-----|-----------|-------------------------------|------|-----------|-------------------------------|------|-----------|-------------------------------|------|-----------|-------------------------------|------|-----------|
|                             | Number of deaths (unweighted) | %    | 95% CI    | Number of deaths (unweighted) | %   | 95% CI    | Number of deaths (unweighted) | %    | 95% CI    | Number of deaths (unweighted) | %    | 95% CI    | Number of deaths (unweighted) | %    | 95% CI    | Number of deaths (unweighted) | %    | 95% CI    |
| Neonatal                    | 547                           |      |           | 254                           |     |           | 230                           |      |           | 62                            |      |           | 236                           |      |           | 311                           |      |           |
| Prematurity                 | 55                            | 10.0 | 6.8–13.2  | 70                            | 2.8 | 22.7–34.1 | 51                            | 23   | 17.4–28.4 | 17                            | 28   | 16.2–38.8 | 65                            | 27   | 20.8–32.2 | 73                            | 25   | 20.3–30.1 |
| IPRE                        | 109                           | 20.0 | 14.2–26.4 | 79                            | 2.9 | 23.5–34.9 | 55                            | 22   | 16.7–27.7 | 25                            | 42   | 29.5–54.5 | 60                            | 22   | 17.0–27.8 | 99                            | 32   | 26.2–36.8 |
| Congenital malformation     | 11                            | 2.0  | 0.5–5.1   | 0                             | 0   | 0–0       | 1                             | 0    | 0–0       | 0                             | 0    | 0–0       | 1                             | 0    | –0.4–1.2  | 0                             | 0    | 0–0       |
| Infection                   | 339                           | 62.0 | 55.9–68.6 | 95                            | 3.8 | 32.3–44.5 | 118                           | 53   | 46.4–59.6 | 17                            | 25   | 14.0–36.0 | 103                           | 48   | 41.6–54.6 | 128                           | 40   | 34.4–45.6 |
| Other                       | 27                            | 5.0  | 2.2–9.4   | 10                            | 4   | 1.5–6.5   | 5                             | 2    | –0.1–3.1  | 3                             | 5    | –0.3–11.1 | 7                             | 3    | 0.5–4.7   | 11                            | 3    | 1.3–5.3   |
| Child 1–59 months           | 1,194                         |      |           | 480                           |     |           | 616                           |      |           | 98                            |      |           | 568                           |      |           | 626                           |      |           |
| Diarrhea                    | 251                           | 21.0 | 15.7–27.0 | 112                           | 2.4 | 20.0–27.8 | 153                           | 26   | 22.7–29.7 | 10                            | 9    | 3.3–14.9  | 127                           | 24.2 | 20.6–27.8 | 148                           | 23.8 | 20.4–27.2 |
| Malaria                     | 263                           | 22.0 | 15.3–28.9 | 105                           | 2.2 | 18.6–26.2 | 115                           | 18   | 14.5–20.7 | 14                            | 15   | 7.8–22.2  | 113                           | 18.4 | 15.1–21.7 | 121                           | 19.3 | 16.1–22.5 |
| Lower respiratory infection | 107                           | 9.0  | 5.4–12.8  | 70                            | 1.4 | 11.2–17.6 | 87                            | 13   | 10.0–15.4 | 25                            | 29   | 19.7–38.1 | 90                            | 14.5 | 11.5–17.5 | 92                            | 14.8 | 12.0–17.6 |
| HIV                         | 12                            | 1.0  | 0.3–2.1   | 9                             | 2   | 0.8–3.4   | 26                            | 4    | 2.4–5.6   | 6                             | 6    | 1.2–10.8  | 22                            | 3.5  | 2.0–5.0   | 19                            | 3.6  | 2.1–5.1   |
| Other infections            | 442                           | 37.0 | 26.8–47.8 | 103                           | 2.0 | 16.5–23.9 | 156                           | 26   | 22.2–29.2 | 14                            | 14   | 7.1–21.3  | 140                           | 26   | 22.3–29.7 | 133                           | 20.2 | 17.0–23.4 |
| Severe malnutrition         | 48                            | 4.0  | 1.5–7.5   | 21                            | 4   | 2.4–6.2   | 26                            | 4    | 2.5–5.7   | 5                             | 4    | 0.2–8.4   | 19                            | 2.9  | 1.5–4.3   | 33                            | 5.4  | 3.6–7.2   |
| Other                       | 72                            | 6.0  | 2.8–9.8   | 60                            | 1.3 | 9.6–15.6  | 53                            | 10   | 7.4–12.2  | 24                            | 22   | 14.0–30.8 | 57                            | 10.5 | 7.9–13.1  | 80                            | 13   | 10.3–15.7 |
| Child 5–14 years old        | 310                           |      |           | 112                           |     |           | 152                           |      |           | 46                            |      |           | 135                           |      |           | 175                           |      |           |
| Diarrhea                    | 33                            | 10.5 | 7.1–13.9  | 11                            | 1.3 | 6.4–18.6  | 21                            | 12.4 | 7.2–17.6  | 0                             | 0    | 0–0       | 13                            | 7.8  | 3.3–12.3  | 19                            | 12.6 | 7.7–17.5  |
| Malaria                     | 39                            | 12.6 | 8.9–16.3  | 20                            | 1.3 | 6.9–19.5  | 22                            | 12.9 | 7.6–18.2  | 4                             | 10   | 1.3–18.7  | 19                            | 12.9 | 7.2–18.6  | 27                            | 12.3 | 7.4–17.2  |
| Lower respiratory infection | 13                            | 4.3  | 2.0–6.6   | 4                             | 2   | –0.5–5.1  | 5                             | 3.1  | 0.3–5.9   | 6                             | 11.9 | 2.5–21.3  | 5                             | 2.7  | 0–5.4     | 10                            | 5.5  | 2.1–8.9   |
| HIV                         | 18                            | 5.7  | 3.1–8.3   | 1                             | 1   | –0.8–3.0  | 7                             | 6.1  | 2.3–9.9   | 6                             | 12.8 | 3.1–22.5  | 5                             | 5.7  | 1.8–9.6   | 9                             | 5.6  | 2.2–9.0   |
| Other infection             | 98                            | 31.7 | 26.5–36.9 | 31                            | 3.4 | 25.4–43.0 | 48                            | 32.5 | 25.1–39.9 | 10                            | 24.2 | 11.8–36.6 | 45                            | 32.2 | 24.3–40.1 | 44                            | 31.3 | 24.4–38.2 |
| Injury                      | 61                            | 19.7 | 15.3–24.1 | 26                            | 2.5 | 16.6–32.6 | 21                            | 14.5 | 8.9–20.1  | 14                            | 28.2 | 15.2–41.2 | 25                            | 19.8 | 13.1–26.5 | 36                            | 19.6 | 13.7–25.5 |
| Tuberculosis                | 4                             | 1.2  | 0–2.4     | 0                             | 0   | 0–0       | 2                             | 2.2  | –0.1–4.5  | 0                             | 0    | 0–0       | 0                             | 0    | 0–0       | 2                             | 2.1  | 0–4.2     |
| Other                       | 45                            | 14.5 | 10.6–18.4 | 19                            | 1.2 | 6.1–18.1  | 26                            | 16.2 | 10.3–22.1 | 6                             | 12.8 | 3.1–22.5  | 23                            | 18.9 | 12.3–25.5 | 28                            | 11   | 6.4–15.6  |
| Age 15–59                   | 2,169                         |      |           | 629                           |     |           | 589                           |      |           | 589                           |      |           | 1,010                         |      |           | 1,156                         |      |           |
| HIV                         | 547                           | 25.2 | 23.3–27.1 | 135                           | 2.6 | 23.4–29.2 | 153                           | 26   | 22.2–29.4 | 153                           | 26   | 22.2–29.4 | 300                           | 29   | 25.7–31.3 | 252                           | 22.2 | 19.8–24.6 |
| Cancer                      | 223                           | 10.3 | 9.0–11.6  | 47                            | 1.2 | 9.8–14    | 56                            | 10   | 7.3–12.3  | 56                            | 10   | 7.3–12.3  | 113                           | 12   | 9.8–13.8  | 96                            | 9    | 7.3–10.7  |
| Injury                      | 286                           | 13.2 | 11.7–14.7 | 101                           | 9   | 7.1–10.7  | 108                           | 18   | 15.0–21.4 | 108                           | 18   | 15.0–21.4 | 80                            | 9    | 7.0–10.6  | 215                           | 17.1 | 14.9–19.3 |
| Maternal                    | 124                           | 5.7  | 4.7–6.7   | 42                            | 6   | 4.7–7.9   | 23                            | 4    | 2.5–5.7   | 23                            | 4    | 2.5–5.7   | 126                           | 12   | 10.2–14.4 | 0                             | 0    | 0–0       |
| Cardiovascular diseases     | 113                           | 5.2  | 4.2–6.2   | 32                            | 5   | 3.7–6.5   | 33                            | 5    | 3.5–7.1   | 33                            | 5    | 3.5–7.1   | 46                            | 4    | 3.1–5.7   | 64                            | 5.9  | 4.5–7.3   |
| Tuberculosis                | 82                            | 3.8  | 3.0–4.6   | 28                            | 4   | 2.6–5.2   | 22                            | 4    | 2.1–5.3   | 22                            | 4    | 2.1–5.3   | 40                            | 4    | 2.6–5.0   | 45                            | 3.8  | 2.7–4.9   |
| Other infections            | 482                           | 22.2 | 20.4–24.0 | 149                           | 2.4 | 20.9–26.5 | 105                           | 18   | 14.5–20.7 | 105                           | 18   | 14.5–20.7 | 193                           | 20   | 17.0–22.0 | 277                           | 24.5 | 22.0–27.0 |
| Other                       | 310                           | 14.3 | 12.8–15.8 | 95                            | 1.4 | 11.5–15.9 | 89                            | 15   | 12.4–18.4 | 89                            | 15   | 12.4–18.4 | 112                           | 11   | 9.0–13.0  | 207                           | 17.3 | 15.1–19.5 |
| Age 60+                     | 1,710                         |      |           | 464                           |     |           | 554                           |      |           | 689                           |      |           | 885                           |      |           | 822                           |      |           |
| HIV                         | 103                           | 6    | 4.9–7.1   | 21                            | 4   | 1.9–6.1   | 37                            | 7    | 4.9–8.7   | 43                            | 6    | 4.4–8.2   | 56                            | 6    | 4.8–8.0   | 45                            | 5.5  | 3.9–7.1   |
| Cancer                      | 272                           | 15.9 | 14.1–17.7 | 67                            | 1.5 | 11.3–19.1 | 108                           | 19   | 15.7–21.7 | 99                            | 14   | 11.3–16.5 | 143                           | 16   | 13.8–18.8 | 131                           | 15.4 | 12.9–17.9 |
| Cardiovascular diseases     | 258                           | 15.1 | 13.4–16.8 | 62                            | 1.4 | 9.9–17.3  | 61                            | 12   | 9.5–14.5  | 123                           | 18   | 15.4–21.2 | 133                           | 16   | 13.4–18.4 | 113                           | 14.1 | 11.7–16.5 |
| Injury                      | 123                           | 7.2  | 5.9–8.5   | 30                            | 6   | 3.5–8.7   | 37                            | 6    | 4.2–7.8   | 63                            | 9    | 6.5–10.7  | 63                            | 7    | 5.1–8.5   | 67                            | 7.6  | 5.8–9.4   |
| Tuberculosis                | 104                           | 6.1  | 4.9–7.3   | 33                            | 7   | 4.6–10.2  | 37                            | 7    | 5.2–9.2   | 32                            | 5    | 3.0–6.2   | 35                            | 4    | 2.6–5.2   | 67                            | 8.5  | 6.6–10.4  |
| Other infections            | 407                           | 23.8 | 21.7–25.9 | 130                           | 2.8 | 23.2–32.8 | 146                           | 27   | 23.6–30.4 | 132                           | 19   | 16.0–22.0 | 200                           | 22   | 19.4–25.0 | 208                           | 25.5 | 22.5–28.5 |
| Other                       | 443                           | 25   | 23.8–     | 121                           | 2   | 20.5–     | 128                           | 22   | 19.2–     | 197                           | 29   | 25.5–     | 255                           | 28   | 25.3–     | 191                           | 23   | 20.3–     |

|  |  |    |      |  |   |      |  |  |      |  |  |      |  |  |      |  |    |      |
|--|--|----|------|--|---|------|--|--|------|--|--|------|--|--|------|--|----|------|
|  |  | .9 | 28.0 |  | 5 | 29.9 |  |  | 25.6 |  |  | 32.5 |  |  | 31.3 |  | .2 | 26.1 |
|--|--|----|------|--|---|------|--|--|------|--|--|------|--|--|------|--|----|------|

IPRE = intrapartum-related event.

\* Results for neonates and children 1 - 59 months are calibrated.

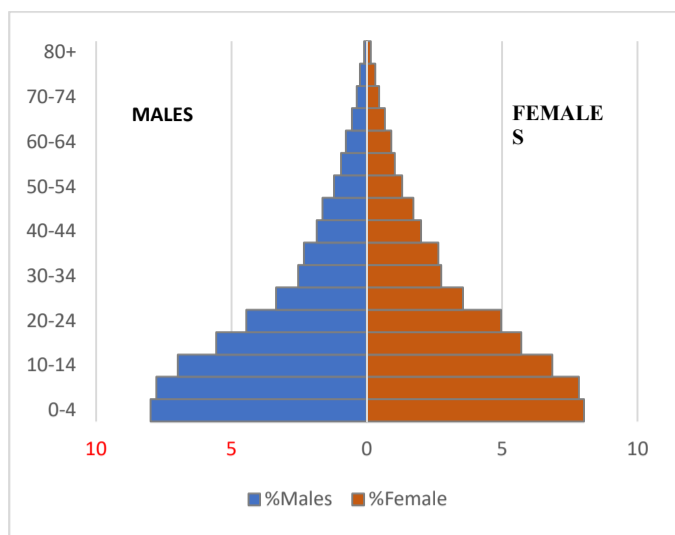

SUPPLEMENTAL APPENDIX FIGURE 1. Age and sex pyramid, COMSA Mozambique.

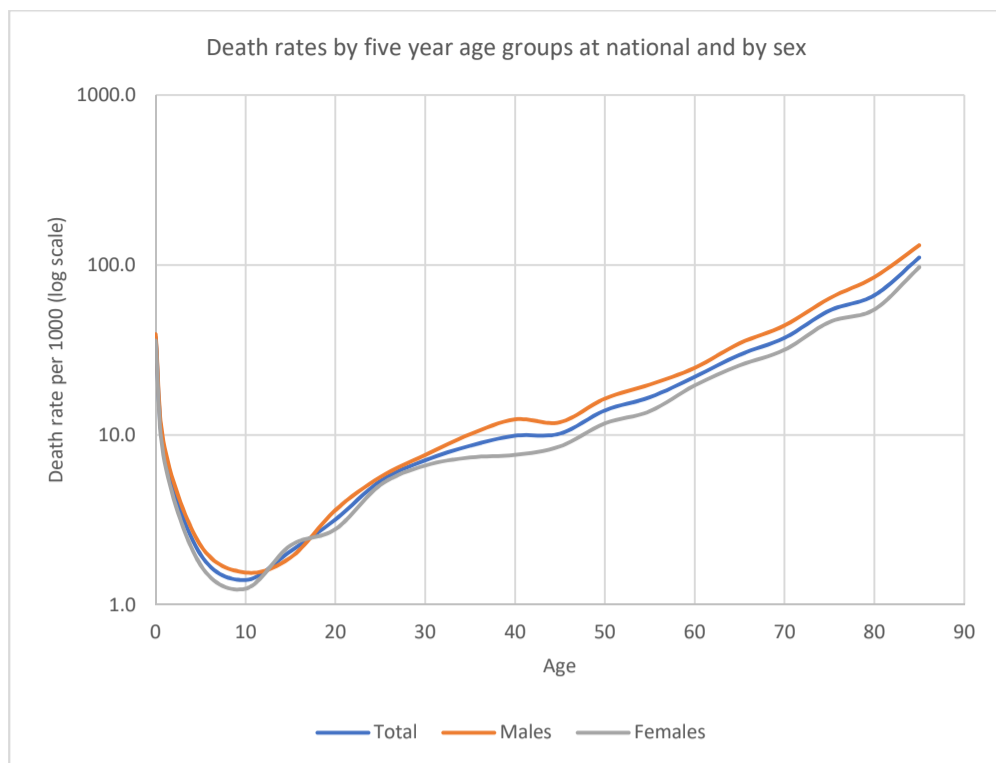

SUPPLEMENTAL APPENDIX FIGURE 2. Distribution of death rates by age at national level and by sex.

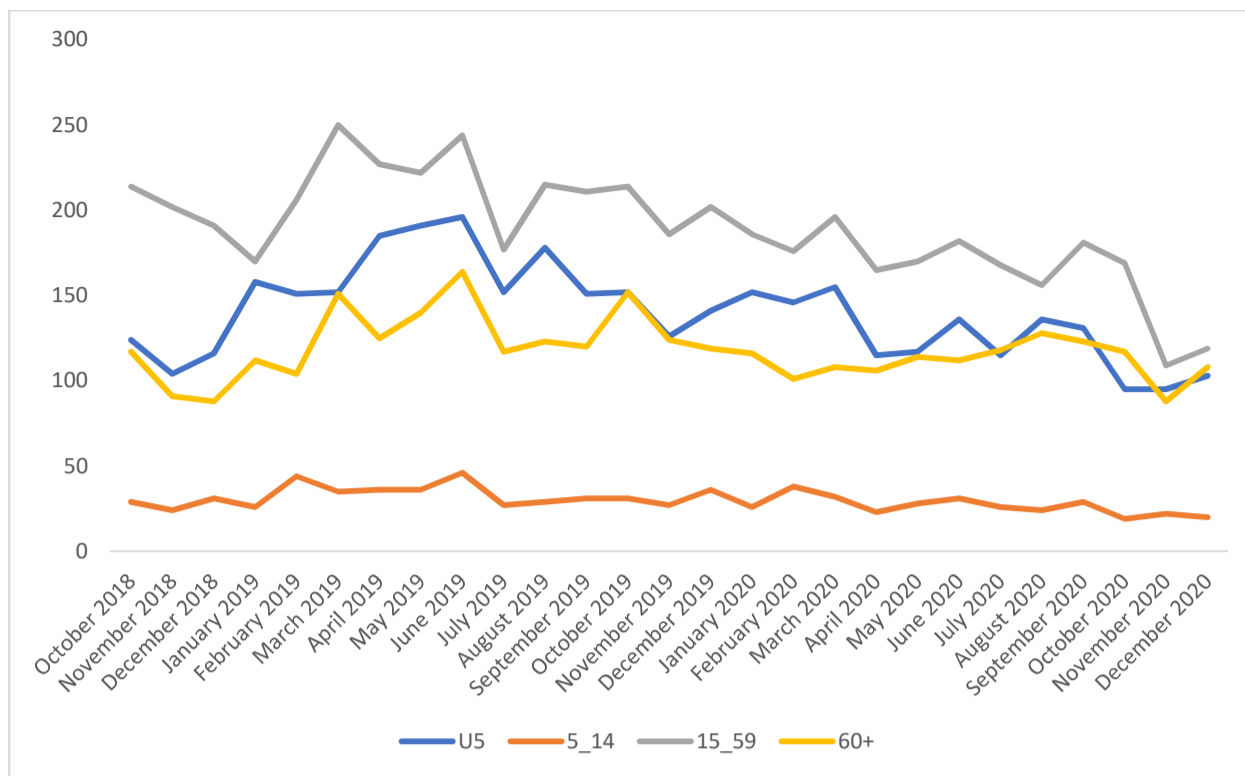

SUPPLEMENTAL APPENDIX FIGURE 3. Monthly number of deaths by age group between October 2018 and December 2020
